# Supplementary material for: Unusual Presentation of SET::NUP214-Associated Concomitant Hematological Neoplasm in a Child—Diagnostic and Treatment Struggle
Source: MDPI journal article supplement (doi:10.3390/ijms241914451), 2023-09-22
Supplement: s1 [file s1]

**Supplementary Table S1.** List of 514 immunodeficiency-related genes used for DNA-based targeted NGS.

| Number | Gene Symbol | Gene Name                                                       | HGNC ID    | Location |
|--------|-------------|-----------------------------------------------------------------|------------|----------|
| 1      | A2ML1       | alpha-2-macroglobulin like 1                                    | HGNC:23336 | 12p13.31 |
| 2      | ABCD4       | ATP binding cassette subfamily D member 4                       | HGNC:68    | 14q24.3  |
| 3      | ACD         | ACD shelterin complex subunit and telomerase recruitment factor | HGNC:25070 | 16q22.1  |
| 4      | ACP5        | acid phosphatase 5, tartrate resistant                          | HGNC:124   | 19p13.2  |
| 5      | ACTB        | actin beta                                                      | HGNC:132   | 7p22.1   |
| 6      | ADA         | adenosine deaminase                                             | HGNC:186   | 20q13.12 |
| 7      | ADA2        | adenosine deaminase 2                                           | HGNC:1839  | 22q11.1  |
| 8      | ADAM17      | ADAM metallopeptidase domain 17                                 | HGNC:195   | 2p25.1   |
| 9      | ADAMTS3     | ADAM metallopeptidase with thrombospondin type 1 motif 3        | HGNC:219   | 4q13.3   |
| 10     | ADAR        | adenosine deaminase RNA specific                                | HGNC:225   | 1q21.3   |
| 11     | ADGRE2      | adhesion G protein-coupled receptor E2                          | HGNC:3337  | 19p13.12 |
| 12     | AGA         | aspartylglucosaminidase                                         | HGNC:318   | 4q34.3   |
| 13     | AICDA       | activation induced cytidine deaminase                           | HGNC:13203 | 12p13.31 |
| 14     | AIRE        | autoimmune regulator                                            | HGNC:360   | 21q22.3  |
| 15     | AK2         | adenylate kinase 2                                              | HGNC:362   | 1p35.1   |
| 16     | ALG12       | ALG12 alpha-1,6-mannosyltransferase                             | HGNC:19358 | 22q13.33 |
| 17     | ALPI        | alkaline phosphatase, intestinal                                | HGNC:437   | 2q37.1   |
| 18     | ANGPT1      | angiopoietin 1                                                  | HGNC:484   | 8q23.1   |
| 19     | AP1S3       | adaptor related protein complex 1 subunit sigma 3               | HGNC:18971 | 2q36.1   |
| 20     | AP3B1       | adaptor related protein complex 3 subunit beta 1                | HGNC:566   | 5q14.1   |
| 21     | AP3D1       | adaptor related protein complex 3 subunit delta 1               | HGNC:568   | 19p13.3  |
| 22     | ARHGEF1     | Rho guanine nucleotide exchange factor 1                        | HGNC:681   | 19q13.2  |
| 23     | ARPC1B      | actin related protein 2/3 complex subunit 1B                    | HGNC:704   | 7q22.1   |
| 24     | ATM         | ATM serine/threonine kinase                                     | HGNC:795   | 11q22.3  |
| 25     | ATP6AP1     | ATPase H <sup>+</sup> transporting accessory protein 1          | HGNC:868   | Xq28     |

|    |         |                                                        |            |          |
|----|---------|--------------------------------------------------------|------------|----------|
| 26 | ATR     | ATR serine/threonine kinase                            | HGNC:882   | 3q23     |
| 27 | AURKB   | aurora kinase B                                        | HGNC:11390 | 17p13.1  |
| 28 | B2M     | beta-2-microglobulin                                   | HGNC:914   | 15q21.1  |
| 29 | BACH2   | BTB domain and CNC homolog 2                           | HGNC:14078 | 6q15     |
| 30 | BCL10   | BCL10 immune signaling adaptor                         | HGNC:989   | 1p22.3   |
| 31 | BCL11B  | BCL11 transcription factor B                           | HGNC:13222 | 14q32.2  |
| 32 | BLM     | BLM RecQ like helicase                                 | HGNC:1058  | 15q26.1  |
| 33 | BLNK    | B cell linker                                          | HGNC:14211 | 10q24.1  |
| 34 | BLOC1S3 | biogenesis of lysosomal organelles complex 1 subunit 3 | HGNC:20914 | 19q13.32 |
| 35 | BLOC1S6 | biogenesis of lysosomal organelles complex 1 subunit 6 | HGNC:8549  | 15q21.1  |
| 36 | BTK     | Bruton tyrosine kinase                                 | HGNC:1133  | Xq22.1   |
| 37 | C1QA    | complement C1q A chain                                 | HGNC:1241  | 1p36.12  |
| 38 | C1QB    | complement C1q B chain                                 | HGNC:1242  | 1p36.12  |
| 39 | C1QC    | complement C1q C chain                                 | HGNC:1245  | 1p36.12  |
| 40 | C1R     | complement C1r                                         | HGNC:1246  | 12p13.31 |
| 41 | C1S     | complement C1s                                         | HGNC:1247  | 12p13.31 |
| 42 | C2      | complement C2                                          | HGNC:1248  | 6p21.33  |
| 43 | C3      | complement C3                                          | HGNC:1318  | 19p13.3  |
| 44 | C3AR1   | complement C3a receptor 1                              | HGNC:1319  | 12p13.31 |
| 45 | C5      | complement C5                                          | HGNC:1331  | 9q33.2   |
| 46 | C6      | complement C6                                          | HGNC:1339  | 5p13.1   |
| 47 | C7      | complement C7                                          | HGNC:1346  | 5p13.1   |
| 48 | C8A     | complement C8 alpha chain                              | HGNC:1352  | 1p32.2   |
| 49 | C8B     | complement C8 beta chain                               | HGNC:1353  | 1p32.2   |
| 50 | C8G     | complement C8 gamma chain                              | HGNC:1354  | 9q34.3   |
| 51 | C9      | complement C9                                          | HGNC:1358  | 5p13.1   |
| 52 | CA2     | carbonic anhydrase 2                                   | HGNC:1373  | 8q21.2   |
| 53 | CARD11  | caspase recruitment domain family member 11            | HGNC:16393 | 7p22.2   |

|    |         |                                                 |            |          |
|----|---------|-------------------------------------------------|------------|----------|
| 54 | CARD14  | caspase recruitment domain family member 14     | HGNC:16446 | 17q25.3  |
| 55 | CARD9   | caspase recruitment domain family member 9      | HGNC:16391 | 9q34.3   |
| 56 | CARMIL2 | capping protein regulator and myosin 1 linker 2 | HGNC:27089 | 16q22.1  |
| 57 | CASP10  | caspase 10                                      | HGNC:1500  | 2q33.1   |
| 58 | CASP8   | caspase 8                                       | HGNC:1509  | 2q33.1   |
| 59 | CBL     | Cbl proto-oncogene                              | HGNC:1541  | 11q23.3  |
| 60 | CBS     | cystathionine beta-synthase                     | HGNC:1550  | 21q22.3  |
| 61 | CCBE1   | collagen and calcium binding EGF domains 1      | HGNC:29426 | 18q21.32 |
| 62 | CD19    | CD19 molecule                                   | HGNC:1633  | 16p11.2  |
| 63 | CD247   | CD247 molecule                                  | HGNC:1677  | 1q24.2   |
| 64 | CD27    | CD27 molecule                                   | HGNC:11922 | 12p13.31 |
| 65 | CD28    | CD28 molecule                                   | HGNC:1653  | 2q33.2   |
| 66 | CD3D    | CD3 delta subunit of T-cell receptor complex    | HGNC:1673  | 11q23.3  |
| 67 | CD3E    | CD3 epsilon subunit of T-cell receptor complex  | HGNC:1674  | 11q23.3  |
| 68 | CD3G    | CD3 gamma subunit of T-cell receptor complex    | HGNC:1675  | 11q23.3  |
| 69 | CD40    | CD40 molecule                                   | HGNC:11919 | 20q13.12 |
| 70 | CD40LG  | CD40 ligand                                     | HGNC:11935 | Xq26.3   |
| 71 | CD48    | CD48 molecule                                   | HGNC:1683  | 1q23.3   |
| 72 | CD55    | CD55 molecule (Cromer blood group)              | HGNC:2665  | 1q32.2   |
| 73 | CD59    | CD59 molecule (CD59 blood group)                | HGNC:1689  | 11p13    |
| 74 | CD70    | CD70 molecule                                   | HGNC:11937 | 19p13.3  |
| 75 | CD79A   | CD79a molecule                                  | HGNC:1698  | 19q13.2  |
| 76 | CD79B   | CD79b molecule                                  | HGNC:1699  | 17q23.3  |
| 77 | CD80    | CD80 molecule                                   | HGNC:1700  | 3q13.33  |
| 78 | CD81    | CD81 molecule                                   | HGNC:1701  | 11p15.5  |
| 79 | CD8A    | CD8 subunit alpha                               | HGNC:1706  | 2p11.2   |
| 80 | CDC42   | cell division cycle 42                          | HGNC:1736  | 1p36.12  |
| 81 | CDCA7   | cell division cycle associated 7                | HGNC:14628 | 2q31.1   |

|     |        |                                                                 |            |                    |
|-----|--------|-----------------------------------------------------------------|------------|--------------------|
| 82  | CEBPE  | CCAAT enhancer binding protein epsilon                          | HGNC:1836  | 14q11.2            |
| 83  | CFB    | complement factor B                                             | HGNC:1037  | 6p21.33            |
| 84  | CFD    | complement factor D                                             | HGNC:2771  | 19p13.3            |
| 85  | CFH    | complement factor H                                             | HGNC:4883  | 1q31.3             |
| 86  | CFI    | complement factor I                                             | HGNC:5394  | 4q25               |
| 87  | CFP    | complement factor properdin                                     | HGNC:8864  | Xp11.23            |
| 88  | CFTR   | CF transmembrane conductance regulator                          | HGNC:1884  | 7q31.2             |
| 89  | CHD7   | chromodomain helicase DNA binding protein 7                     | HGNC:20626 | 8q12.2             |
| 90  | CIB1   | calcium and integrin binding 1                                  | HGNC:16920 | 15q26.1            |
| 91  | CIITA  | class II major histocompatibility complex transactivator        | HGNC:7067  | 16p13.13           |
| 92  | CLCN7  | chloride voltage-gated channel 7                                | HGNC:2025  | 16p13.3            |
| 93  | CLPB   | caseinolytic mitochondrial matrix peptidase chaperone subunit B | HGNC:30664 | 11q13.4            |
| 94  | COG6   | component of oligomeric golgi complex 6                         | HGNC:18621 | 13q14.11           |
| 95  | COL2A1 | collagen type II alpha 1 chain                                  | HGNC:2200  | 12q13.11           |
| 96  | COL7A1 | collagen type VII alpha 1 chain                                 | HGNC:2214  | 3p21.31            |
| 97  | COPA   | COPI coat complex subunit alpha                                 | HGNC:2230  | 1q23.2             |
| 98  | COPG1  | COPI coat complex subunit gamma 1                               | HGNC:2236  | 3q21.3             |
| 99  | COPZ1  | COPI coat complex subunit zeta 1                                | HGNC:2243  | 12q13.13           |
| 100 | CORO1A | coronin 1A                                                      | HGNC:2252  | 16p11.2            |
| 101 | CR2    | complement C3d receptor 2                                       | HGNC:2336  | 1q32.2             |
| 102 | CSF2RA | colony stimulating factor 2 receptor subunit alpha              | HGNC:2435  | Xp22.32 and Yp11.3 |
| 103 | CSF2RB | colony stimulating factor 2 receptor subunit beta               | HGNC:2436  | 22q12.3            |
| 104 | CSF3R  | colony stimulating factor 3 receptor                            | HGNC:2439  | 1p34.3             |
| 105 | CTC1   | CST telomere replication complex component 1                    | HGNC:26169 | 17p13.1            |
| 106 | CTLA4  | cytotoxic T-lymphocyte associated protein 4                     | HGNC:2505  | 2q33.2             |
| 107 | CTPS1  | CTP synthase 1                                                  | HGNC:2519  | 1p34.2             |
| 108 | CTSC   | cathepsin C                                                     | HGNC:2528  | 11q14.2            |
| 109 | CXCR4  | C-X-C motif chemokine receptor 4                                | HGNC:2561  | 2q22.1             |

|     |          |                                                            |            |              |
|-----|----------|------------------------------------------------------------|------------|--------------|
| 110 | CYBA     | cytochrome b-245 alpha chain                               | HGNC:2577  | 16q24.2      |
| 111 | CYBB     | cytochrome b-245 beta chain                                | HGNC:2578  | Xp21.1-p11.4 |
| 112 | CYBC1    | cytochrome b-245 chaperone 1                               | HGNC:28672 | 17q25.3      |
| 113 | DBF4     | DBF4 zinc finger                                           | HGNC:17364 | 7q21.12      |
| 114 | DBR1     | debranching RNA lariats 1                                  | HGNC:15594 | 3q22.3       |
| 115 | DCLRE1C  | DNA cross-link repair 1C                                   | HGNC:17642 | 10p13        |
| 116 | RIGI     | RNA sensor RIG-I                                           | HGNC:19102 | 9p21.1       |
| 117 | DEF6     | DEF6 guanine nucleotide exchange factor                    | HGNC:2760  | 6p21.31      |
| 118 | DIAPH1   | diaphanous related formin 1                                | HGNC:2876  | 5q31.3       |
| 119 | DKC1     | dyskerin pseudouridine synthase 1                          | HGNC:2890  | Xq28         |
| 120 | DNASE1   | deoxyribonuclease 1                                        | HGNC:2956  | 16p13.3      |
| 121 | DNASE1L3 | deoxyribonuclease 1 like 3                                 | HGNC:2959  | 3p14.3       |
| 122 | DNASE2   | deoxyribonuclease 2, lysosomal                             | HGNC:2960  | 19p13.13     |
| 123 | DNMT3B   | DNA methyltransferase 3 beta                               | HGNC:2979  | 20q11.21     |
| 124 | DOCK11   | dedicator of cytokinesis 11                                | HGNC:23483 | Xq24         |
| 125 | DOCK2    | dedicator of cytokinesis 2                                 | HGNC:2988  | 5q35.1       |
| 126 | DOCK8    | dedicator of cytokinesis 8                                 | HGNC:19191 | 9p24.3       |
| 127 | DPAGT1   | dolichyl-phosphate N-acetylglucosaminephosphotransferase 1 | HGNC:2995  | 11q23.3      |
| 128 | DSG1     | desmoglein 1                                               | HGNC:3048  | 18q12.1      |
| 129 | DTNBP1   | dystrobrevin binding protein 1                             | HGNC:17328 | 6p22.3       |
| 130 | EDA      | ectodysplasin A                                            | HGNC:3157  | Xq13.1       |
| 131 | EDAR     | ectodysplasin A receptor                                   | HGNC:2895  | 2q13         |
| 132 | EDARADD  | EDAR associated via death domain                           | HGNC:14341 | 1q42.3-q43   |
| 133 | EFL1     | elongation factor like GTPase 1                            | HGNC:25789 | 15q25.2      |
| 134 | EGFR     | epidermal growth factor receptor                           | HGNC:3236  | 7p11.2       |
| 135 | EIF6     | eukaryotic translation initiation factor 6                 | HGNC:6159  | 20q11.22     |
| 136 | ELANE    | elastase, neutrophil expressed                             | HGNC:3309  | 19p13.3      |
| 137 | ELP1     | elongator acetyltransferase complex subunit 1              | HGNC:5959  | 9q31.3       |

|     |         |                                                       |            |               |
|-----|---------|-------------------------------------------------------|------------|---------------|
| 138 | EP300   | E1A binding protein p300                              | HGNC:3373  | 22q13.2       |
| 139 | EPCAM   | epithelial cell adhesion molecule                     | HGNC:11529 | 2p21          |
| 140 | EPG5    | ectopic P-granules 5 autophagy tethering factor       | HGNC:29331 | 18q12.3-q21.1 |
| 141 | ERBIN   | erbb2 interacting protein                             | HGNC:15842 | 5q12.3        |
| 142 | EXTL3   | exostosin like glycosyltransferase 3                  | HGNC:3518  | 8p21.1        |
| 143 | F12     | coagulation factor XII                                | HGNC:3530  | 5q35.3        |
| 144 | FADD    | Fas associated via death domain                       | HGNC:3573  | 11q13.3       |
| 145 | FAM111B | FAM111 trypsin like peptidase B                       | HGNC:24200 | 11q12.1       |
| 146 | FAS     | Fas cell surface death receptor                       | HGNC:11920 | 10q23.31      |
| 147 | FASLG   | Fas ligand                                            | HGNC:11936 | 1q24.3        |
| 148 | FAT4    | FAT atypical cadherin 4                               | HGNC:23109 | 4q28.1        |
| 149 | FBN1    | fibrillin 1                                           | HGNC:3603  | 15q21.1       |
| 150 | FCGR3A  | Fc gamma receptor IIIa                                | HGNC:3619  | 1q23.3        |
| 151 | FCGR3B  | Fc gamma receptor IIIb                                | HGNC:3620  | 1q23.3        |
| 152 | FCHO1   | FCH and mu domain containing endocytic adaptor 1      | HGNC:29002 | 19p13.11      |
| 153 | FECH    | ferrochelatase                                        | HGNC:3647  | 18q21.31      |
| 154 | FERMT1  | FERM domain containing kindlin 1                      | HGNC:15889 | 20p12.3       |
| 155 | FERMT3  | FERM domain containing kindlin 3                      | HGNC:23151 | 11q13.1       |
| 156 | FNIP1   | folliculin interacting protein 1                      | HGNC:29418 | 5q31.1        |
| 157 | FOXP1   | forkhead box N1                                       | HGNC:12765 | 17q11.2       |
| 158 | FOXP3   | forkhead box P3                                       | HGNC:6106  | Xp11.23       |
| 159 | G6PC3   | glucose-6-phosphatase catalytic subunit 3             | HGNC:24861 | 17q21.31      |
| 160 | GATA1   | GATA binding protein 1                                | HGNC:4170  | Xp11.23       |
| 161 | GATA2   | GATA binding protein 2                                | HGNC:4171  | 3q21.3        |
| 162 | GBA1    | glucosylceramidase beta 1                             | HGNC:4177  | 1q22          |
| 163 | GFI1    | growth factor independent 1 transcriptional repressor | HGNC:4237  | 1p22.1        |
| 164 | GIMAP6  | GTPase, IMAP family member 6                          | HGNC:21918 | 7q36.1        |
| 165 | GINS1   | GINS complex subunit 1                                | HGNC:28980 | 20p11.21      |

|     |        |                                                             |            |          |
|-----|--------|-------------------------------------------------------------|------------|----------|
| 166 | GJC2   | gap junction protein gamma 2                                | HGNC:17494 | 1q42.13  |
| 167 | GLA    | galactosidase alpha                                         | HGNC:4296  | Xq22.1   |
| 168 | GUCY2C | guanylate cyclase 2C                                        | HGNC:4688  | 12p12.3  |
| 169 | HAVCR2 | hepatitis A virus cellular receptor 2                       | HGNC:18437 | 5q33.3   |
| 170 | HAX1   | HCLS1 associated protein X-1                                | HGNC:16915 | 1q21.3   |
| 171 | HELLS  | helicase, lymphoid specific                                 | HGNC:4861  | 10q23.33 |
| 172 | HFE    | homeostatic iron regulator                                  | HGNC:4886  | 6p22.2   |
| 173 | HMOX1  | heme oxygenase 1                                            | HGNC:5013  | 22q12.3  |
| 174 | HPS1   | HPS1 biogenesis of lysosomal organelles complex 3 subunit 1 | HGNC:5163  | 10q24.2  |
| 175 | HPS3   | HPS3 biogenesis of lysosomal organelles complex 2 subunit 1 | HGNC:15597 | 3q24     |
| 176 | HPS4   | HPS4 biogenesis of lysosomal organelles complex 3 subunit 2 | HGNC:15844 | 22q12.1  |
| 177 | HPS5   | HPS5 biogenesis of lysosomal organelles complex 2 subunit 2 | HGNC:17022 | 11p15.1  |
| 178 | HPS6   | HPS6 biogenesis of lysosomal organelles complex 2 subunit 3 | HGNC:18817 | 10q24.32 |
| 179 | HRAS   | HRas proto-oncogene, GTPase                                 | HGNC:5173  | 11p15.5  |
| 180 | HSPA1L | heat shock protein family A (Hsp70) member 1 like           | HGNC:5234  | 6p21.33  |
| 181 | HYOU1  | hypoxia up-regulated 1                                      | HGNC:16931 | 11q23.3  |
| 182 | ICOS   | inducible T cell costimulator                               | HGNC:5351  | 2q33.2   |
| 183 | ICOSLG | inducible T cell costimulator ligand                        | HGNC:17087 | 21q22.3  |
| 184 | IFIH1  | interferon induced with helicase C domain 1                 | HGNC:18873 | 2q24.2   |
| 185 | IFNAR1 | interferon alpha and beta receptor subunit 1                | HGNC:5432  | 21q22.11 |
| 186 | IFNAR2 | interferon alpha and beta receptor subunit 2                | HGNC:5433  | 21q22.11 |
| 187 | IFNG   | interferon gamma                                            | HGNC:5438  | 12q15    |
| 188 | IFNGR1 | interferon gamma receptor 1                                 | HGNC:5439  | 6q23.3   |
| 189 | IFNGR2 | interferon gamma receptor 2                                 | HGNC:5440  | 21q22.11 |
| 190 | IGHM   | immunoglobulin heavy constant mu                            | HGNC:5541  | 14q32.33 |
| 191 | IGKC   | immunoglobulin kappa constant                               | HGNC:5716  | 2p11.2   |
| 192 | IGLL1  | immunoglobulin lambda like polypeptide 1                    | HGNC:5870  | 22q11.23 |
| 193 | IKBKB  | inhibitor of nuclear factor kappa B kinase subunit beta     | HGNC:5960  | 8p11.21  |

|     |         |                                                                     |            |          |
|-----|---------|---------------------------------------------------------------------|------------|----------|
| 194 | IKBKG   | inhibitor of nuclear factor kappa B kinase regulatory subunit gamma | HGNC:5961  | Xq28     |
| 195 | IKZF1   | IKAROS family zinc finger 1                                         | HGNC:13176 | 7p12.2   |
| 196 | IL10    | interleukin 10                                                      | HGNC:5962  | 1q32.1   |
| 197 | IL10RA  | interleukin 10 receptor subunit alpha                               | HGNC:5964  | 11q23.3  |
| 198 | IL10RB  | interleukin 10 receptor subunit beta                                | HGNC:5965  | 21q22.11 |
| 199 | IL11RA  | interleukin 11 receptor subunit alpha                               | HGNC:5967  | 9p13.3   |
| 200 | IL12B   | interleukin 12B                                                     | HGNC:5970  | 5q33.3   |
| 201 | IL12RB1 | interleukin 12 receptor subunit beta 1                              | HGNC:5971  | 19p13.11 |
| 202 | IL12RB2 | interleukin 12 receptor subunit beta 2                              | HGNC:5972  | 1p31.3   |
| 203 | IL17F   | interleukin 17F                                                     | HGNC:16404 | 6p12.2   |
| 204 | IL17RA  | interleukin 17 receptor A                                           | HGNC:5985  | 22q11.1  |
| 205 | IL17RC  | interleukin 17 receptor C                                           | HGNC:18358 | 3p25.3   |
| 206 | IL18BP  | interleukin 18 binding protein                                      | HGNC:5987  | 11q13.4  |
| 207 | IL1RN   | interleukin 1 receptor antagonist                                   | HGNC:6000  | 2q14.1   |
| 208 | IL21    | interleukin 21                                                      | HGNC:6005  | 4q27     |
| 209 | IL21R   | interleukin 21 receptor                                             | HGNC:6006  | 16p12.1  |
| 210 | IL2RA   | interleukin 2 receptor subunit alpha                                | HGNC:6008  | 10p15.1  |
| 211 | IL2RB   | interleukin 2 receptor subunit beta                                 | HGNC:6009  | 22q12.3  |
| 212 | IL2RG   | interleukin 2 receptor subunit gamma                                | HGNC:6010  | Xq13.1   |
| 213 | IL36RN  | interleukin 36 receptor antagonist                                  | HGNC:15561 | 2q14.1   |
| 214 | IL6R    | interleukin 6 receptor                                              | HGNC:6019  | 1q21.3   |
| 215 | IL6ST   | interleukin 6 cytokine family signal transducer                     | HGNC:6021  | 5q11.2   |
| 216 | IL7R    | interleukin 7 receptor                                              | HGNC:6024  | 5p13.2   |
| 217 | IRAK4   | interleukin 1 receptor associated kinase 4                          | HGNC:17967 | 12q12    |
| 218 | IRF2BP2 | interferon regulatory factor 2 binding protein 2                    | HGNC:21729 | 1q42.3   |
| 219 | IRF3    | interferon regulatory factor 3                                      | HGNC:6118  | 19q13.33 |
| 220 | IRF4    | interferon regulatory factor 4                                      | HGNC:6119  | 6p25.3   |
| 221 | IRF7    | interferon regulatory factor 7                                      | HGNC:6122  | 11p15.5  |

|     |          |                                                             |            |          |
|-----|----------|-------------------------------------------------------------|------------|----------|
| 222 | IRF8     | interferon regulatory factor 8                              | HGNC:5358  | 16q24.1  |
| 223 | IRF9     | interferon regulatory factor 9                              | HGNC:6131  | 14q12    |
| 224 | ISG15    | ISG15 ubiquitin like modifier                               | HGNC:4053  | 1p36.33  |
| 225 | ITCH     | itchy E3 ubiquitin protein ligase                           | HGNC:13890 | 20q11.22 |
| 226 | ITGA3    | integrin subunit alpha 3                                    | HGNC:6139  | 17q21.33 |
| 227 | ITGB2    | integrin subunit beta 2                                     | HGNC:6155  | 21q22.3  |
| 228 | ITGB4    | integrin subunit beta 4                                     | HGNC:6158  | 17q25.1  |
| 229 | ITK      | IL2 inducible T cell kinase                                 | HGNC:6171  | 5q33.3   |
| 230 | ITPKB    | inositol-trisphosphate 3-kinase B                           | HGNC:6179  | 1q42.12  |
| 231 | ITPR3    | inositol 1,4,5-trisphosphate receptor type 3                | HGNC:6182  | 6p21.31  |
| 232 | IVD      | isovaleryl-CoA dehydrogenase                                | HGNC:6186  | 15q15.1  |
| 233 | IVNS1ABP | influenza virus NS1A binding protein                        | HGNC:16951 | 1q25.3   |
| 234 | JAGN1    | jagunal homolog 1                                           | HGNC:26926 | 3p25.3   |
| 235 | JAK1     | Janus kinase 1                                              | HGNC:6190  | 1p31.3   |
| 236 | JAK3     | Janus kinase 3                                              | HGNC:6193  | 19p13.11 |
| 237 | KDM1A    | lysine demethylase 1A                                       | HGNC:29079 | 1p36.12  |
| 238 | KDM6A    | lysine demethylase 6A                                       | HGNC:12637 | Xp11.3   |
| 239 | KMT2A    | lysine methyltransferase 2A                                 | HGNC:7132  | 11q23.3  |
| 240 | KMT2D    | lysine methyltransferase 2D                                 | HGNC:7133  | 12q13.12 |
| 241 | KNG1     | kininogen 1                                                 | HGNC:6383  | 3q27.3   |
| 242 | KRAS     | KRAS proto-oncogene, GTPase                                 | HGNC:6407  | 12p12.1  |
| 243 | LACC1    | laccase domain containing 1                                 | HGNC:26789 | 13q14.11 |
| 244 | LAMA3    | laminin subunit alpha 3                                     | HGNC:6483  | 18q11.2  |
| 245 | LAMB3    | laminin subunit beta 3                                      | HGNC:6490  | 1q32.2   |
| 246 | LAMC2    | laminin subunit gamma 2                                     | HGNC:6493  | 1q25.3   |
| 247 | LAMTOR2  | late endosomal/lysosomal adaptor, MAPK and MTOR activator 2 | HGNC:29796 | 1q22     |
| 248 | LAT      | linker for activation of T cells                            | HGNC:18874 | 16q13    |
| 249 | LCK      | LCK proto-oncogene, Src family tyrosine kinase              | HGNC:6524  | 1p35.2   |

|     |         |                                                    |            |               |
|-----|---------|----------------------------------------------------|------------|---------------|
| 250 | LCP2    | lymphocyte cytosolic protein 2                     | HGNC:6529  | 5q35.1        |
| 251 | LIG1    | DNA ligase 1                                       | HGNC:6598  | 19q13.33      |
| 252 | LIG4    | DNA ligase 4                                       | HGNC:6601  | 13q33.3       |
| 253 | LMBRD1  | LMBR1 domain containing 1                          | HGNC:23038 | 6q13          |
| 254 | LPIN2   | lipin 2                                            | HGNC:14450 | 18p11.31      |
| 255 | LRBA    | LPS responsive beige-like anchor protein           | HGNC:1742  | 4q31.3        |
| 256 | LRP5    | LDL receptor related protein 5                     | HGNC:6697  | 11q13.2       |
| 257 | LRRC8A  | leucine rich repeat containing 8 VRAC subunit A    | HGNC:19027 | 9q34.11       |
| 258 | LYN     | LYN proto-oncogene, Src family tyrosine kinase     | HGNC:6735  | 8q12.1        |
| 259 | LYST    | lysosomal trafficking regulator                    | HGNC:1968  | 1q42.3        |
| 260 | LZTR1   | leucine zipper like transcription regulator 1      | HGNC:6742  | 22q11.21      |
| 261 | MAGT1   | magnesium transporter 1                            | HGNC:28880 | Xq21.1        |
| 262 | MALT1   | MALT1 paracaspase                                  | HGNC:6819  | 18q21.32      |
| 263 | MAN2B1  | mannosidase alpha class 2B member 1                | HGNC:6826  | 19p13.13      |
| 264 | MAP2K1  | mitogen-activated protein kinase kinase 1          | HGNC:6840  | 15q22.31      |
| 265 | MAP2K2  | mitogen-activated protein kinase kinase 2          | HGNC:6842  | 19p13.3       |
| 266 | MAP3K14 | mitogen-activated protein kinase kinase kinase 14  | HGNC:6853  | 17q21.31      |
| 267 | MCM4    | minichromosome maintenance complex component 4     | HGNC:6947  | 8q11.21       |
| 268 | MEFV    | MEFV innate immunity regulator, pyrin              | HGNC:6998  | 16p13.3       |
| 269 | MMAA    | metabolism of cobalamin associated A               | HGNC:18871 | 4q31.21       |
| 270 | MMAB    | metabolism of cobalamin associated B               | HGNC:19331 | 12q24.11      |
| 271 | MMACHC  | metabolism of cobalamin associated C               | HGNC:24525 | 1p34.1        |
| 272 | MMADHC  | metabolism of cobalamin associated D               | HGNC:25221 | 2q23.2        |
| 273 | MMUT    | methylmalonyl-CoA mutase                           | HGNC:7526  | 6p12.3        |
| 274 | MOGS    | mannosyl-oligosaccharide glucosidase               | HGNC:24862 | 2p13.1        |
| 275 | MPO     | myeloperoxidase                                    | HGNC:7218  | 17q22         |
| 276 | MRE11   | MRE11 homolog, double strand break repair nuclease | HGNC:7230  | 11q21         |
| 277 | MRTFA   | myocardin related transcription factor A           | HGNC:14334 | 22q13.1-q13.2 |

|     |         |                                                                                                 |            |                |
|-----|---------|-------------------------------------------------------------------------------------------------|------------|----------------|
| 278 | MS4A1   | membrane spanning 4-domains A1                                                                  | HGNC:7315  | 11q12.2        |
| 279 | MSN     | moesin                                                                                          | HGNC:7373  | Xq12           |
| 280 | MTHFD1  | methylenetetrahydrofolate dehydrogenase, cyclohydrolase and formyltetrahydrofolate synthetase 1 | HGNC:7432  | 14q23.3        |
| 281 | MTRR    | 5-methyltetrahydrofolate-homocysteine methyltransferase reductase                               | HGNC:7473  | 5p15.31        |
| 282 | MVK     | mevalonate kinase                                                                               | HGNC:7530  | 12q24.11       |
| 283 | MYD88   | MYD88 innate immune signal transduction adaptor                                                 | HGNC:7562  | 3p22.2         |
| 284 | MYO5A   | myosin VA                                                                                       | HGNC:7602  | 15q21.2        |
| 285 | MYO5B   | myosin VB                                                                                       | HGNC:7603  | 18q            |
| 286 | MYOF    | myoferlin                                                                                       | HGNC:3656  | 10q23.33       |
| 287 | MYSM1   | Myb like, SWIRM and MPN domains 1                                                               | HGNC:29401 | 1p32.1         |
| 288 | NBAS    | NBAS subunit of NRZ tethering complex                                                           | HGNC:15625 | 2p24.3         |
| 289 | NBN     | nibrin                                                                                          | HGNC:7652  | 8q21.3         |
| 290 | NCF1    | neutrophil cytosolic factor 1                                                                   | HGNC:7660  | 7q11.23        |
| 291 | NCF2    | neutrophil cytosolic factor 2                                                                   | HGNC:7661  | 1q25.3         |
| 292 | NCF4    | neutrophil cytosolic factor 4                                                                   | HGNC:7662  | 22q12.3        |
| 293 | NCKAP1L | NCK associated protein 1 like                                                                   | HGNC:4862  | 12q13.13-q13.2 |
| 294 | NCSTN   | nicastatin                                                                                      | HGNC:17091 | 1q23.2         |
| 295 | NF1     | neurofibromin 1                                                                                 | HGNC:7765  | 17q11.2        |
| 296 | NF2     | NF2, moesin-ezrin-radixin like (MERLIN) tumor suppressor                                        | HGNC:7773  | 22q12.2        |
| 297 | NFE2L2  | NFE2 like bZIP transcription factor 2                                                           | HGNC:7782  | 2q31.2         |
| 298 | NFIL3   | nuclear factor, interleukin 3 regulated                                                         | HGNC:7787  | 9q22.31        |
| 299 | NFKB1   | nuclear factor kappa B subunit 1                                                                | HGNC:7794  | 4q24           |
| 300 | NFKB2   | nuclear factor kappa B subunit 2                                                                | HGNC:7795  | 10q24.32       |
| 301 | NFKBIA  | NFKB inhibitor alpha                                                                            | HGNC:7797  | 14q13.2        |
| 302 | NHEJ1   | non-homologous end joining factor 1                                                             | HGNC:25737 | 2q35           |
| 303 | NHP2    | NHP2 ribonucleoprotein                                                                          | HGNC:14377 | 5q35.3         |
| 304 | NLRC4   | NLR family CARD domain containing 4                                                             | HGNC:16412 | 2p22.3         |
| 305 | NLRP1   | NLR family pyrin domain containing 1                                                            | HGNC:14374 | 17p13          |

|     |         |                                                                        |            |          |
|-----|---------|------------------------------------------------------------------------|------------|----------|
| 306 | NLRP12  | NLR family pyrin domain containing 12                                  | HGNC:22938 | 19q13.42 |
| 307 | NLRP3   | NLR family pyrin domain containing 3                                   | HGNC:16400 | 1q44     |
| 308 | NLRP6   | NLR family pyrin domain containing 6                                   | HGNC:22944 | 11p15.5  |
| 309 | NOD2    | nucleotide binding oligomerization domain containing 2                 | HGNC:5331  | 16q12.1  |
| 310 | NOP10   | NOP10 ribonucleoprotein                                                | HGNC:14378 | 15q14    |
| 311 | NOS2    | nitric oxide synthase 2                                                | HGNC:7873  | 17q11.2  |
| 312 | NRAS    | NRAS proto-oncogene, GTPase                                            | HGNC:7989  | 1p13.2   |
| 313 | NSMCE3  | NSE3 homolog, SMC5-SMC6 complex component                              | HGNC:7677  | 15q13.1  |
| 314 | NUP214  | nucleoporin 214                                                        | HGNC:8064  | 9q34.13  |
| 315 | OAS1    | 2'-5'-oligoadenylate synthetase 1                                      | HGNC:8086  | 12q24.13 |
| 316 | ORAI1   | ORAI calcium release-activated calcium modulator 1                     | HGNC:25896 | 12q24.31 |
| 317 | OSTM1   | osteoclastogenesis associated transmembrane protein 1                  | HGNC:21652 | 6q21     |
| 318 | OTULIN  | OTU deubiquitinase with linear linkage specificity                     | HGNC:25118 | 5p15.2   |
| 319 | PARN    | poly(A)-specific ribonuclease                                          | HGNC:8609  | 16p13.12 |
| 320 | PCCA    | propionyl-CoA carboxylase subunit alpha                                | HGNC:8653  | 13q32.3  |
| 321 | PCCB    | propionyl-CoA carboxylase subunit beta                                 | HGNC:8654  | 3q22.3   |
| 322 | PEPD    | peptidase D                                                            | HGNC:8840  | 19q13.11 |
| 323 | PGM3    | phosphoglucomutase 3                                                   | HGNC:8907  | 6q14.1   |
| 324 | PIK3CD  | phosphatidylinositol-4,5-bisphosphate 3-kinase catalytic subunit delta | HGNC:8977  | 1p36.22  |
| 325 | PIK3CG  | phosphatidylinositol-4,5-bisphosphate 3-kinase catalytic subunit gamma | HGNC:8978  | 7q22.3   |
| 326 | PIK3R1  | phosphoinositide-3-kinase regulatory subunit 1                         | HGNC:8979  | 5q13.1   |
| 327 | PLCG2   | phospholipase C gamma 2                                                | HGNC:9066  | 16q24.1  |
| 328 | PLEKHM1 | pleckstrin homology and RUN domain containing M1                       | HGNC:29017 | 17q21.31 |
| 329 | PLG     | plasminogen                                                            | HGNC:9071  | 6q26     |
| 330 | PLVAP   | plasmalemma vesicle associated protein                                 | HGNC:13635 | 19p13.11 |
| 331 | PMM2    | phosphomannomutase 2                                                   | HGNC:9115  | 16p13.2  |
| 332 | PNP     | purine nucleoside phosphorylase                                        | HGNC:7892  | 14q11.2  |
| 333 | POGLUT1 | protein O-glucosyltransferase 1                                        | HGNC:22954 | 3q13.33  |

|     |         |                                                            |            |               |
|-----|---------|------------------------------------------------------------|------------|---------------|
| 334 | POLA1   | DNA polymerase alpha 1, catalytic subunit                  | HGNC:9173  | Xp22.11-p21.3 |
| 335 | POLD1   | DNA polymerase delta 1, catalytic subunit                  | HGNC:9175  | 19q13.3       |
| 336 | POLD2   | DNA polymerase delta 2, accessory subunit                  | HGNC:9176  | 7p13          |
| 337 | POLD3   | DNA polymerase delta 3, accessory subunit                  | HGNC:20932 | 11q13.4       |
| 338 | POLE    | DNA polymerase epsilon, catalytic subunit                  | HGNC:9177  | 12q24.33      |
| 339 | POLE2   | DNA polymerase epsilon 2, accessory subunit                | HGNC:9178  | 14q21.3       |
| 340 | POLR3A  | RNA polymerase III subunit A                               | HGNC:30074 | 10q22.3       |
| 341 | POLR3C  | RNA polymerase III subunit C                               | HGNC:30076 | 1q21.1        |
| 342 | POLR3F  | RNA polymerase III subunit F                               | HGNC:15763 | 20p11.23      |
| 343 | POMP    | proteasome maturation protein                              | HGNC:20330 | 13q12.3       |
| 344 | POU2AF1 | POU class 2 homeobox associating factor 1                  | HGNC:9211  | 11q23.1       |
| 345 | PRDX1   | peroxiredoxin 1                                            | HGNC:9352  | 1p34.1        |
| 346 | PRF1    | perforin 1                                                 | HGNC:9360  | 10q22.1       |
| 347 | PRKCD   | protein kinase C delta                                     | HGNC:9399  | 3p21.1        |
| 348 | PRKDC   | protein kinase, DNA-activated, catalytic subunit           | HGNC:9413  | 8q11.21       |
| 349 | PSEN1   | presenilin 1                                               | HGNC:9508  | 14q24.2       |
| 350 | PSENEN  | presenilin enhancer, gamma-secretase subunit               | HGNC:30100 | 19q13.12      |
| 351 | PSMA3   | proteasome 20S subunit alpha 3                             | HGNC:9532  | 14q23.1       |
| 352 | PSMA5   | proteasome 20S subunit alpha 5                             | HGNC:9534  | 1p13.3        |
| 353 | PSMB10  | proteasome 20S subunit beta 10                             | HGNC:9538  | 16q22.1       |
| 354 | PSMB4   | proteasome 20S subunit beta 4                              | HGNC:9541  | 1q21.3        |
| 355 | PSMB8   | proteasome 20S subunit beta 8                              | HGNC:9545  | 6p21.32       |
| 356 | PSMB9   | proteasome 20S subunit beta 9                              | HGNC:9546  | 6p21.32       |
| 357 | PSMC5   | proteasome 26S subunit, ATPase 5                           | HGNC:9552  | 17q23.3       |
| 358 | PSMG2   | proteasome assembly chaperone 2                            | HGNC:24929 | 18p11.21      |
| 359 | PSTPIP1 | proline-serine-threonine phosphatase interacting protein 1 | HGNC:9580  | 15q24.3       |
| 360 | PTCRA   | pre T cell antigen receptor alpha                          | HGNC:21290 | 6p21.1        |
| 361 | PTEN    | phosphatase and tensin homolog                             | HGNC:9588  | 10q23.31      |

|     |          |                                                                |            |              |
|-----|----------|----------------------------------------------------------------|------------|--------------|
| 362 | PTPN11   | protein tyrosine phosphatase non-receptor type 11              | HGNC:9644  | 12q24.13     |
| 363 | PTPN2    | protein tyrosine phosphatase non-receptor type 2               | HGNC:9650  | 18p11.21     |
| 364 | PTPRC    | protein tyrosine phosphatase receptor type C                   | HGNC:9666  | 1q31.3-q32.1 |
| 365 | RAB27A   | RAB27A, member RAS oncogene family                             | HGNC:9766  | 15q21.3      |
| 366 | RAC2     | Rac family small GTPase 2                                      | HGNC:9802  | 22q13.1      |
| 367 | RAG1     | recombination activating 1                                     | HGNC:9831  | 11p12        |
| 368 | RAG2     | recombination activating 2                                     | HGNC:9832  | 11p12        |
| 369 | RANBP2   | RAN binding protein 2                                          | HGNC:9848  | 2q13         |
| 370 | RASA2    | RAS p21 protein activator 2                                    | HGNC:9872  | 3q23         |
| 371 | RASGRP1  | RAS guanyl releasing protein 1                                 | HGNC:9878  | 15q14        |
| 372 | RBCK1    | RANBP2-type and C3HC4-type zinc finger containing 1            | HGNC:15864 | 20p13        |
| 373 | RC3H1    | ring finger and CCCH-type domains 1                            | HGNC:29434 | 1q25.1       |
| 374 | REL      | REL proto-oncogene, NF-kB subunit                              | HGNC:9954  | 2p16.1       |
| 375 | RELA     | RELA proto-oncogene, NF-kB subunit                             | HGNC:9955  | 11q13.1      |
| 376 | RELB     | RELB proto-oncogene, NF-kB subunit                             | HGNC:9956  | 19q13.32     |
| 377 | RFX5     | regulatory factor X5                                           | HGNC:9986  | 1q21.3       |
| 378 | RFXANK   | regulatory factor X associated ankyrin containing protein      | HGNC:9987  | 19p13.11     |
| 379 | RFXAP    | regulatory factor X associated protein                         | HGNC:9988  | 13q13.3      |
| 380 | RHOG     | ras homolog family member G                                    | HGNC:672   | 11p15.4      |
| 381 | RHOH     | ras homolog family member H                                    | HGNC:686   | 4p14         |
| 382 | RIPK1    | receptor interacting serine/threonine kinase 1                 | HGNC:10019 | 6p25.2       |
| 383 | RMRP     | RNA component of mitochondrial RNA processing endoribonuclease | HGNC:10031 | 9p13.3       |
| 384 | RNASEH2A | ribonuclease H2 subunit A                                      | HGNC:18518 | 19p13.13     |
| 385 | RNASEH2B | ribonuclease H2 subunit B                                      | HGNC:25671 | 13q14.3      |
| 386 | RNASEH2C | ribonuclease H2 subunit C                                      | HGNC:24116 | 11q13.1      |
| 387 | RNF168   | ring finger protein 168                                        | HGNC:26661 | 3q29         |
| 388 | RNF31    | ring finger protein 31                                         | HGNC:16031 | 14q12        |
| 389 | RNU4ATAC | RNA, U4atac small nuclear                                      | HGNC:34016 | 2q14.2       |

|     |          |                                                                                 |            |               |
|-----|----------|---------------------------------------------------------------------------------|------------|---------------|
| 390 | RORC     | RAR related orphan receptor C                                                   | HGNC:10260 | 1q21          |
| 391 | RPSA     | ribosomal protein SA                                                            | HGNC:6502  | 3p22.1        |
| 392 | RRAS     | RAS related                                                                     | HGNC:10447 | 19q13.33      |
| 393 | RRAS2    | RAS related 2                                                                   | HGNC:17271 | 11p15.2       |
| 394 | RTEL1    | regulator of telomere elongation helicase 1                                     | HGNC:15888 | 20q13.33      |
| 395 | SAMD9L   | sterile alpha motif domain containing 9 like                                    | HGNC:1349  | 7q21.2        |
| 396 | SAMHD1   | SAM and HD domain containing deoxynucleoside triphosphate triphosphohydrolase 1 | HGNC:15925 | 20q11.23      |
| 397 | SASH3    | SAM and SH3 domain containing 3                                                 | HGNC:15975 | Xq26.1        |
| 398 | SBDS     | SBDS ribosome maturation factor                                                 | HGNC:19440 | 7q11.21       |
| 399 | SC5D     | sterol-C5-desaturase                                                            | HGNC:10547 | 11q23.3-q24.1 |
| 400 | SEC61A1  | SEC61 translocon subunit alpha 1                                                | HGNC:18276 | 3q21.3        |
| 401 | SEMA3E   | semaphorin 3E                                                                   | HGNC:10727 | 7q21.11       |
| 402 | SERPINB1 | serpin family B member 1                                                        | HGNC:3311  | 6p25.2        |
| 403 | SERPING1 | serpin family G member 1                                                        | HGNC:1228  | 11q12.1       |
| 404 | SH2D1A   | SH2 domain containing 1A                                                        | HGNC:10820 | Xq25          |
| 405 | SH3BP2   | SH3 domain binding protein 2                                                    | HGNC:10825 | 4p16.3        |
| 406 | SH3KBP1  | SH3 domain containing kinase binding protein 1                                  | HGNC:13867 | Xp22.12       |
| 407 | SHARPIN  | SHANK associated RH domain interactor                                           | HGNC:25321 | 8q24.3        |
| 408 | SKIC2    | SKI2 subunit of superkiller complex                                             | HGNC:10898 | 6p21.33       |
| 409 | SLC29A3  | solute carrier family 29 member 3                                               | HGNC:23096 | 10q22.1       |
| 410 | SLC35A1  | solute carrier family 35 member A1                                              | HGNC:11021 | 6q15          |
| 411 | SLC35C1  | solute carrier family 35 member C1                                              | HGNC:20197 | 11p11.2       |
| 412 | SLC37A4  | solute carrier family 37 member 4                                               | HGNC:4061  | 11q23.3       |
| 413 | SLC39A4  | solute carrier family 39 member 4                                               | HGNC:17129 | 8q24.3        |
| 414 | SLC39A7  | solute carrier family 39 member 7                                               | HGNC:4927  | 6p21.32       |
| 415 | SLC39A8  | solute carrier family 39 member 8                                               | HGNC:20862 | 4q24          |
| 416 | SLC46A1  | solute carrier family 46 member 1                                               | HGNC:30521 | 17q11.2       |
| 417 | SLC7A7   | solute carrier family 7 member 7                                                | HGNC:11065 | 14q11.2       |

|     |          |                                                                                                   |            |              |
|-----|----------|---------------------------------------------------------------------------------------------------|------------|--------------|
| 418 | SLCO2A1  | solute carrier organic anion transporter family member 2A1                                        | HGNC:10955 | 3q22.1-q22.2 |
| 419 | SMARCAL1 | SWI/SNF related, matrix associated, actin dependent regulator of chromatin, subfamily a like 1    | HGNC:11102 | 2q35         |
| 420 | SMARCD2  | SWI/SNF related, matrix associated, actin dependent regulator of chromatin, subfamily d, member 2 | HGNC:11107 | 17q23.3      |
| 421 | SMC1A    | structural maintenance of chromosomes 1A                                                          | HGNC:11111 | Xp11.22      |
| 422 | SMC3     | structural maintenance of chromosomes 3                                                           | HGNC:2468  | 10q25.2      |
| 423 | SMPD1    | sphingomyelin phosphodiesterase 1                                                                 | HGNC:11120 | 11p15.4      |
| 424 | SNORA31  | small nucleolar RNA, H/ACA box 31                                                                 | HGNC:32621 | 13q14.13     |
| 425 | SNX10    | sorting nexin 10                                                                                  | HGNC:14974 | 7p15.2       |
| 426 | SOCS1    | suppressor of cytokine signaling 1                                                                | HGNC:19383 | 16p13.13     |
| 427 | SP1      | Sp1 transcription factor                                                                          | HGNC:11205 | 12q13.13     |
| 428 | SP110    | SP110 nuclear body protein                                                                        | HGNC:5401  | 2q37.1       |
| 429 | SPI1     | Spi-1 proto-oncogene                                                                              | HGNC:11241 | 11p11.2      |
| 430 | SPINK5   | serine peptidase inhibitor Kazal type 5                                                           | HGNC:15464 | 5q32         |
| 431 | SPPL2A   | signal peptide peptidase like 2A                                                                  | HGNC:30227 | 15q21.2      |
| 432 | SRP54    | signal recognition particle 54                                                                    | HGNC:11301 | 14q13.2      |
| 433 | STAT1    | signal transducer and activator of transcription 1                                                | HGNC:11362 | 2q32.2       |
| 434 | STAT2    | signal transducer and activator of transcription 2                                                | HGNC:11363 | 12q13.3      |
| 435 | STAT3    | signal transducer and activator of transcription 3                                                | HGNC:11364 | 17q21.2      |
| 436 | STAT5B   | signal transducer and activator of transcription 5B                                               | HGNC:11367 | 17q21.2      |
| 437 | STIM1    | stromal interaction molecule 1                                                                    | HGNC:11386 | 11p15.4      |
| 438 | STING1   | stimulator of interferon response cGAMP interactor 1                                              | HGNC:27962 | 5q31.2       |
| 439 | STK4     | serine/threonine kinase 4                                                                         | HGNC:11408 | 20q13.12     |
| 440 | STN1     | STN1 subunit of CST complex                                                                       | HGNC:26200 | 10q24.33     |
| 441 | STX11    | syntaxin 11                                                                                       | HGNC:11429 | 6q24.2       |
| 442 | STXBP2   | syntaxin binding protein 2                                                                        | HGNC:11445 | 19p13.2      |
| 443 | STXBP3   | syntaxin binding protein 3                                                                        | HGNC:11446 | 1p13.3       |
| 444 | TAP1     | transporter 1, ATP binding cassette subfamily B member                                            | HGNC:43    | 6p21.32      |
| 445 | TAP2     | transporter 2, ATP binding cassette subfamily B member                                            | HGNC:44    | 6p21.32      |

|     |           |                                                                             |            |          |
|-----|-----------|-----------------------------------------------------------------------------|------------|----------|
| 446 | TAPBP     | TAP binding protein                                                         | HGNC:11566 | 6p21.32  |
| 447 | TAFAZZIN  | tafazzin, phospholipid-lysophospholipid transacylase                        | HGNC:11577 | Xq28     |
| 448 | TBK1      | TANK binding kinase 1                                                       | HGNC:11584 | 12q14.2  |
| 449 | TBX1      | T-box transcription factor 1                                                | HGNC:11592 | 22q11.21 |
| 450 | TBX21     | T-box transcription factor 21                                               | HGNC:11599 | 17q21.32 |
| 451 | TCF3      | transcription factor 3                                                      | HGNC:11633 | 19p13.3  |
| 452 | TCIRG1    | T cell immune regulator 1, ATPase H <sup>+</sup> transporting V0 subunit a3 | HGNC:11647 | 11q13.2  |
| 453 | TCN2      | transcobalamin 2                                                            | HGNC:11653 | 22q12.2  |
| 454 | TERC      | telomerase RNA component                                                    | HGNC:11727 | 3q26.2   |
| 455 | TERT      | telomerase reverse transcriptase                                            | HGNC:11730 | 5p15.33  |
| 456 | TFR2      | transferrin receptor 2                                                      | HGNC:11762 | 7q22.1   |
| 457 | TFRC      | transferrin receptor                                                        | HGNC:11763 | 3q29     |
| 458 | TGFBR1    | transforming growth factor beta receptor 1                                  | HGNC:11772 | 9q22.33  |
| 459 | TGFBR2    | transforming growth factor beta receptor 2                                  | HGNC:11773 | 3p24.1   |
| 460 | THBD      | thrombomodulin                                                              | HGNC:11784 | 20p11.21 |
| 461 | TICAM1    | TIR domain containing adaptor molecule 1                                    | HGNC:18348 | 19p13.3  |
| 462 | TIMM50    | translocase of inner mitochondrial membrane 50                              | HGNC:23656 | 19q13.2  |
| 463 | TINF2     | TERF1 interacting nuclear factor 2                                          | HGNC:11824 | 14q12    |
| 464 | TLR3      | toll like receptor 3                                                        | HGNC:11849 | 4q35.1   |
| 465 | TLR7      | toll like receptor 7                                                        | HGNC:15631 | Xp22.2   |
| 466 | TLR8      | toll like receptor 8                                                        | HGNC:15632 | Xp22.2   |
| 467 | TMC6      | transmembrane channel like 6                                                | HGNC:18021 | 17q25.3  |
| 468 | TMC8      | transmembrane channel like 8                                                | HGNC:20474 | 17q25.3  |
| 469 | TNFAIP3   | TNF alpha induced protein 3                                                 | HGNC:11896 | 6q23.3   |
| 470 | TNFRSF11A | TNF receptor superfamily member 11a                                         | HGNC:11908 | 18q21.33 |
| 471 | TNFRSF13B | TNF receptor superfamily member 13B                                         | HGNC:18153 | 17p11.2  |
| 472 | TNFRSF13C | TNF receptor superfamily member 13C                                         | HGNC:17755 | 22q13.2  |
| 473 | TNFRSF1A  | TNF receptor superfamily member 1A                                          | HGNC:11916 | 12p13.31 |

|     |          |                                                      |            |          |
|-----|----------|------------------------------------------------------|------------|----------|
| 474 | TNFRSF4  | TNF receptor superfamily member 4                    | HGNC:11918 | 1p36.33  |
| 475 | TNFRSF9  | TNF receptor superfamily member 9                    | HGNC:11924 | 1p36.23  |
| 476 | TNFSF11  | TNF superfamily member 11                            | HGNC:11926 | 13q14    |
| 477 | TNFSF12  | TNF superfamily member 12                            | HGNC:11927 | 17p13.1  |
| 478 | TNFSF13  | TNF superfamily member 13                            | HGNC:11928 | 17p13.1  |
| 479 | TOM1     | target of myb1 membrane trafficking protein          | HGNC:11982 | 22q12.3  |
| 480 | TOP2B    | DNA topoisomerase II beta                            | HGNC:11990 | 3p24.2   |
| 481 | TPP1     | tripeptidyl peptidase 1                              | HGNC:2073  | 11p15.4  |
| 482 | TPP2     | tripeptidyl peptidase 2                              | HGNC:12016 | 13q33.1  |
| 483 | TRAC     | T cell receptor alpha constant                       | HGNC:12029 | 14q11.2  |
| 484 | TRAF3    | TNF receptor associated factor 3                     | HGNC:12033 | 14q32.32 |
| 485 | TRAF3IP2 | TRAF3 interacting protein 2                          | HGNC:1343  | 6q21     |
| 486 | TREX1    | three prime repair exonuclease 1                     | HGNC:12269 | 3p21.31  |
| 487 | TRIM22   | tripartite motif containing 22                       | HGNC:16379 | 11p15.4  |
| 488 | TRNT1    | tRNA nucleotidyl transferase 1                       | HGNC:17341 | 3p26.2   |
| 489 | TSPEAR   | thrombospondin type laminin G domain and EAR repeats | HGNC:1268  | 21q22.3  |
| 490 | SKIC3    | SKI3 subunit of superkiller complex                  | HGNC:23639 | 5q15     |
| 491 | TTC7A    | tetratricopeptide repeat domain 7A                   | HGNC:19750 | 2p21     |
| 492 | TYK2     | tyrosine kinase 2                                    | HGNC:12440 | 19p13.2  |
| 493 | UBA1     | Ubiquitin Like Modifier Activating Enzyme 1          | HGNC:12469 | Xp11.3   |
| 494 | UNC13D   | unc-13 homolog D                                     | HGNC:23147 | 17q25.3  |
| 495 | UNC93B1  | unc-93 homolog B1, TLR signaling regulator           | HGNC:13481 | 11q13.2  |
| 496 | UNG      | uracil DNA glycosylase                               | HGNC:12572 | 12q24.11 |
| 497 | USB1     | U6 snRNA biogenesis phosphodiesterase 1              | HGNC:25792 | 16q21    |
| 498 | USP18    | ubiquitin specific peptidase 18                      | HGNC:12616 | 22q11.2  |
| 499 | USP43    | ubiquitin specific peptidase 43                      | HGNC:20072 | 17p13.1  |
| 500 | VAV1     | vav guanine nucleotide exchange factor 1             | HGNC:12657 | 19p13.3  |
| 501 | VPS13B   | vacuolar protein sorting 13 homolog B                | HGNC:2183  | 8q22.2   |

|     |        |                                                            |            |          |
|-----|--------|------------------------------------------------------------|------------|----------|
| 502 | VPS45  | vacuolar protein sorting 45 homolog                        | HGNC:14579 | 1q21.2   |
| 503 | WAS    | WASP actin nucleation promoting factor                     | HGNC:12731 | Xp11.23  |
| 504 | WDR1   | WD repeat domain 1                                         | HGNC:12754 | 4p16.1   |
| 505 | WDR44  | WD repeat domain 44                                        | HGNC:30512 | Xq24     |
| 506 | WIPF1  | WAS/WASL interacting protein family member 1               | HGNC:12736 | 2q31.1   |
| 507 | WNT2B  | Wnt family member 2B                                       | HGNC:12781 | 1p13.2   |
| 508 | WNT6   | Wnt family member 6                                        | HGNC:12785 | 2q35     |
| 509 | WRAP53 | WD repeat containing antisense to TP53                     | HGNC:25522 | 17p13.1  |
| 510 | XIAP   | X-linked inhibitor of apoptosis                            | HGNC:592   | Xq25     |
| 511 | XRCC4  | X-ray repair cross complementing 4                         | HGNC:12831 | 5q14.2   |
| 512 | ZAP70  | zeta chain of T cell receptor associated protein kinase 70 | HGNC:12858 | 2q11.2   |
| 513 | ZBTB24 | zinc finger and BTB domain containing 24                   | HGNC:21143 | 6q21     |
| 514 | ZNF341 | zinc finger protein 341                                    | HGNC:15992 | 20q11.22 |
